# Supplementary material for: Temperature-dependent excited states for detecting reversible phase transitions in 2D lead(ii) iodide perovskites
Source: Royal Society of Chemistry journal article supplement (doi:10.1039/d4dt01210k), 2024-01-01
Supplement: d4dt01210k1.pdf [file d4dt01210k1.pdf]

## Supporting Information

# Temperature-dependent excited-state for detecting reversible phase transitions in 2D lead(II) iodide perovskites

*Mahboubeh Jamshidi,\* James M. Gardner\**

Department of Chemistry, Division of Applied Physical Chemistry, KTH Royal Institute of Technology, SE-100 44 Stockholm, Sweden.

[mahjam@kth.se](mailto:mahjam@kth.se) and [jgardner@kth.se](mailto:jgardner@kth.se)

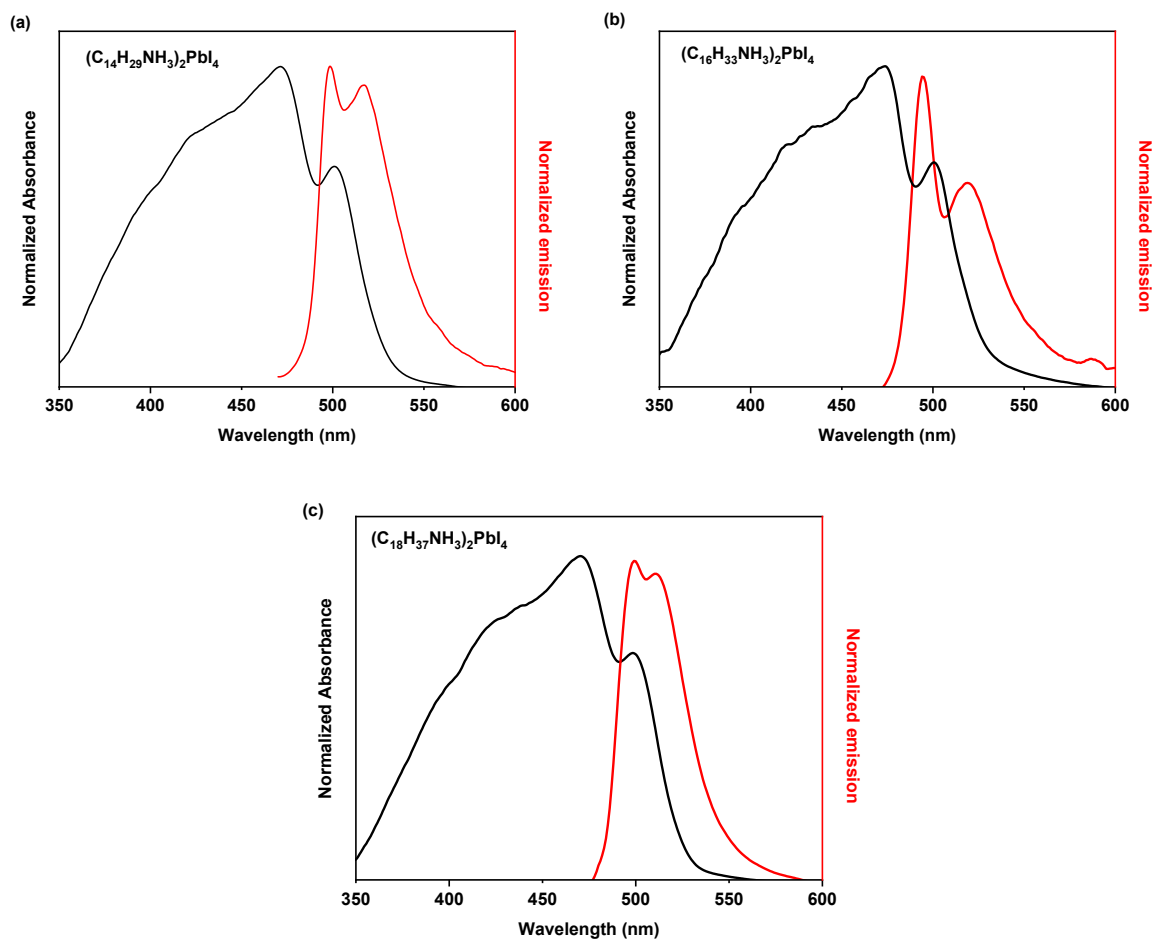

**Figure S1.** Absorbance and PL emission spectra of powder of (a)  $(C_{14}H_{29}NH_3)_2PbI_4$ , (b)  $(C_{16}H_{33}NH_3)_2PbI_4$ , and (c)  $(C_{18}H_{37}NH_3)_2PbI_4$  at room temperature.

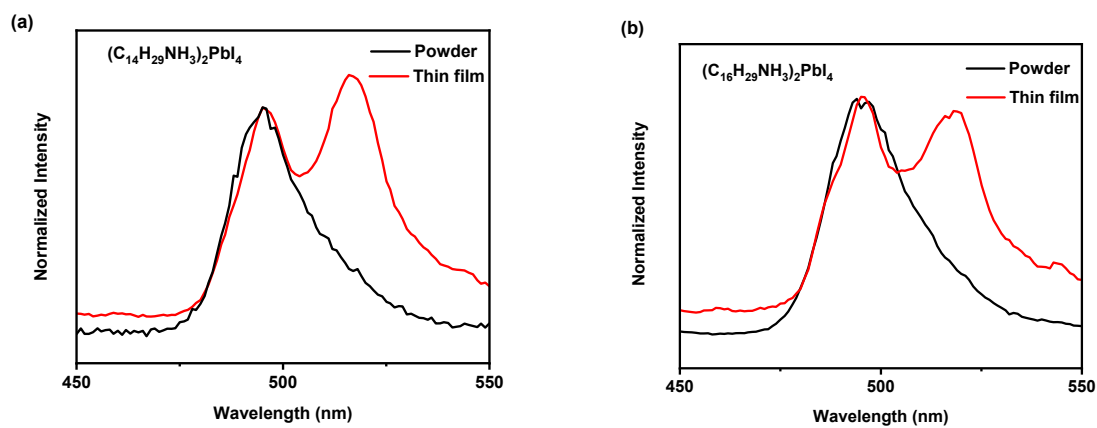

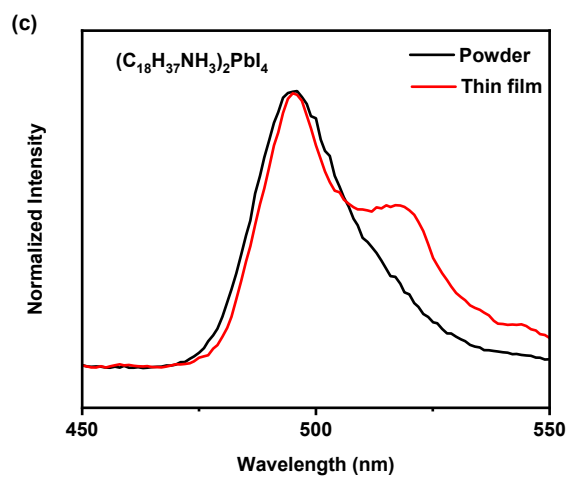

Figure S2. Comparison of PL emission spectra of (a)  $(\text{C}_{14}\text{H}_{29}\text{NH}_3)_2\text{PbI}_4$ , (b)  $(\text{C}_{16}\text{H}_{33}\text{NH}_3)_2\text{PbI}_4$ , and (c)  $(\text{C}_{18}\text{H}_{37}\text{NH}_3)_2\text{PbI}_4$  thin films and fresh powder samples at room temperature.

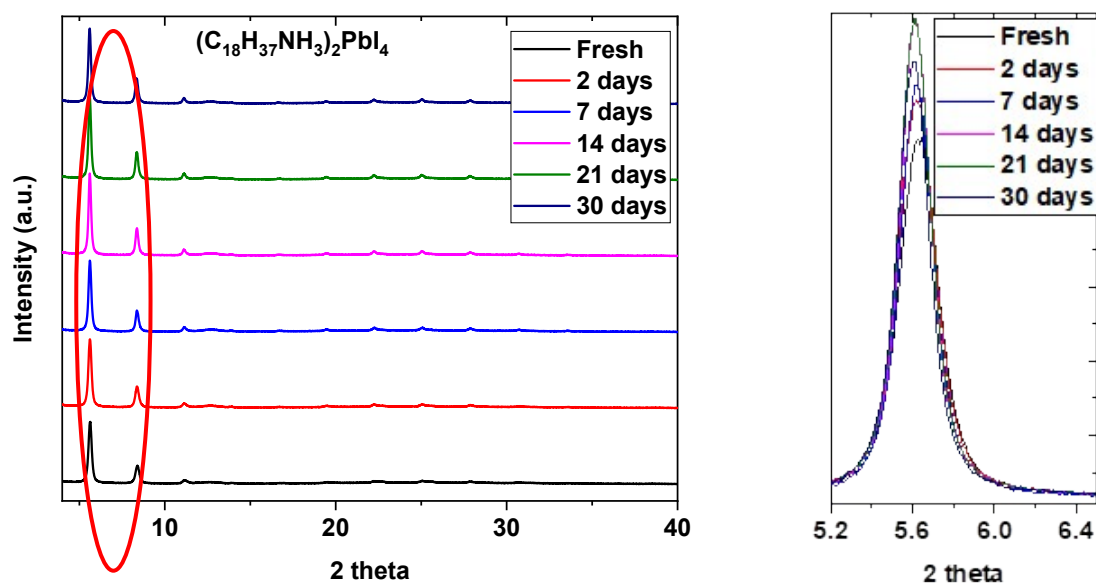

Figure S3. XRD pattern of  $(\text{C}_{18}\text{H}_{37}\text{NH}_3)_2\text{PbI}_4$  2D perovskite stored under ambient conditions.

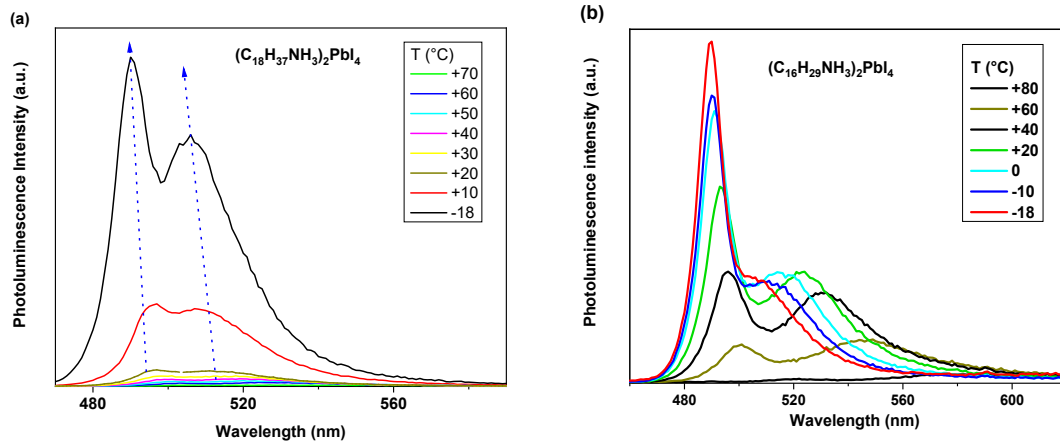

**Figure S4.** Temperature dependent photoluminescence spectra of (a)  $(C_{18}H_{37}NH_3)_2PbI_4$ , and (b)  $(C_{16}H_{29}NH_3)_2PbI_4$ , in the temperature range from 70 to  $-18$  °C (reverse measurement) with  $\lambda_{ex}$  360 nm.

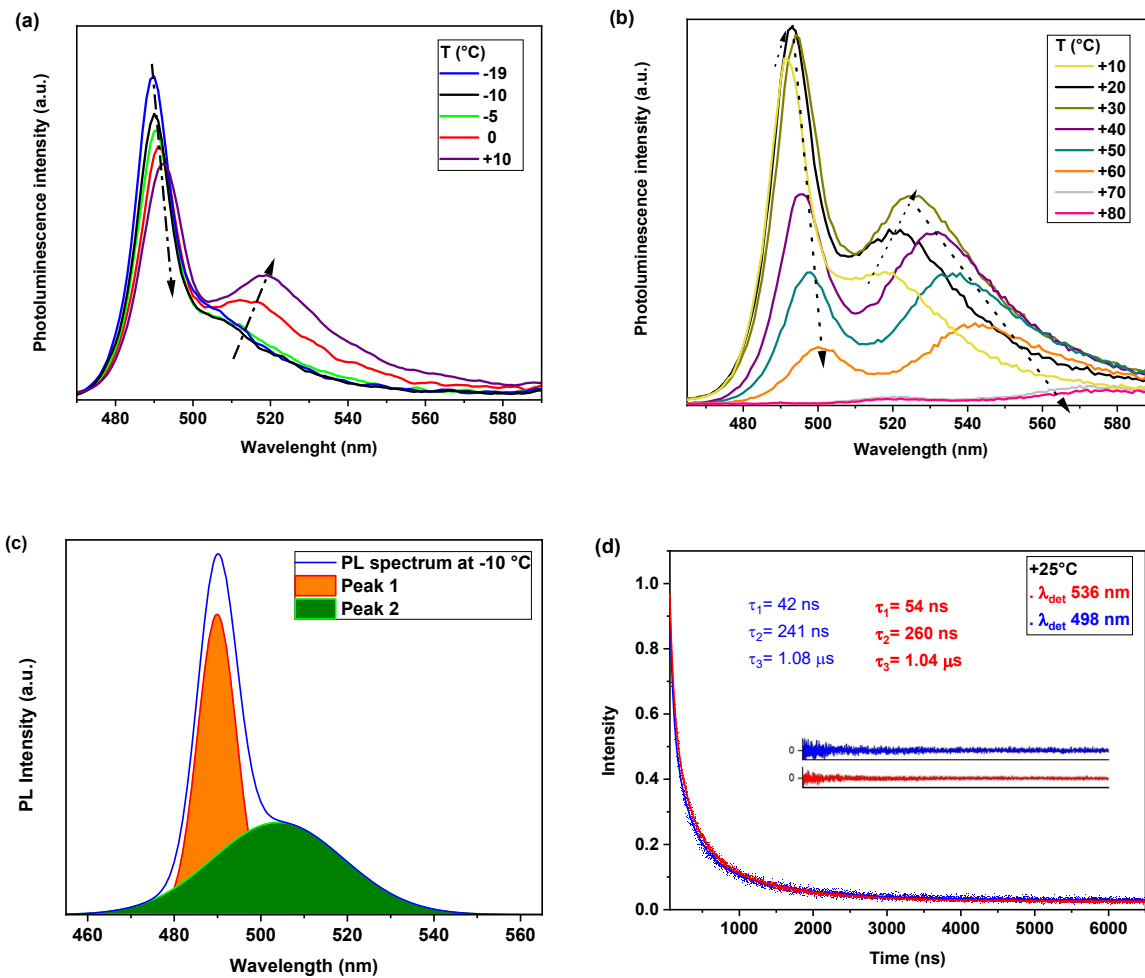

**Figure S5.** Temperature dependent photoluminescence spectra of  $(C_{16}H_{33}NH_3)_2PbI_4$  in the temperature range (a) from -18 to 10 °C, (b) from 10 to 80 °C with  $\lambda_{ex}$  360 nm. (c) Fitting of PL spectra with Gaussian multi-peak function at -10 °C. (d) Normalized time-resolved photoluminescence decay traces of  $(C_{16}H_{33}NH_3)_2PbI_4$  at 25 °C.

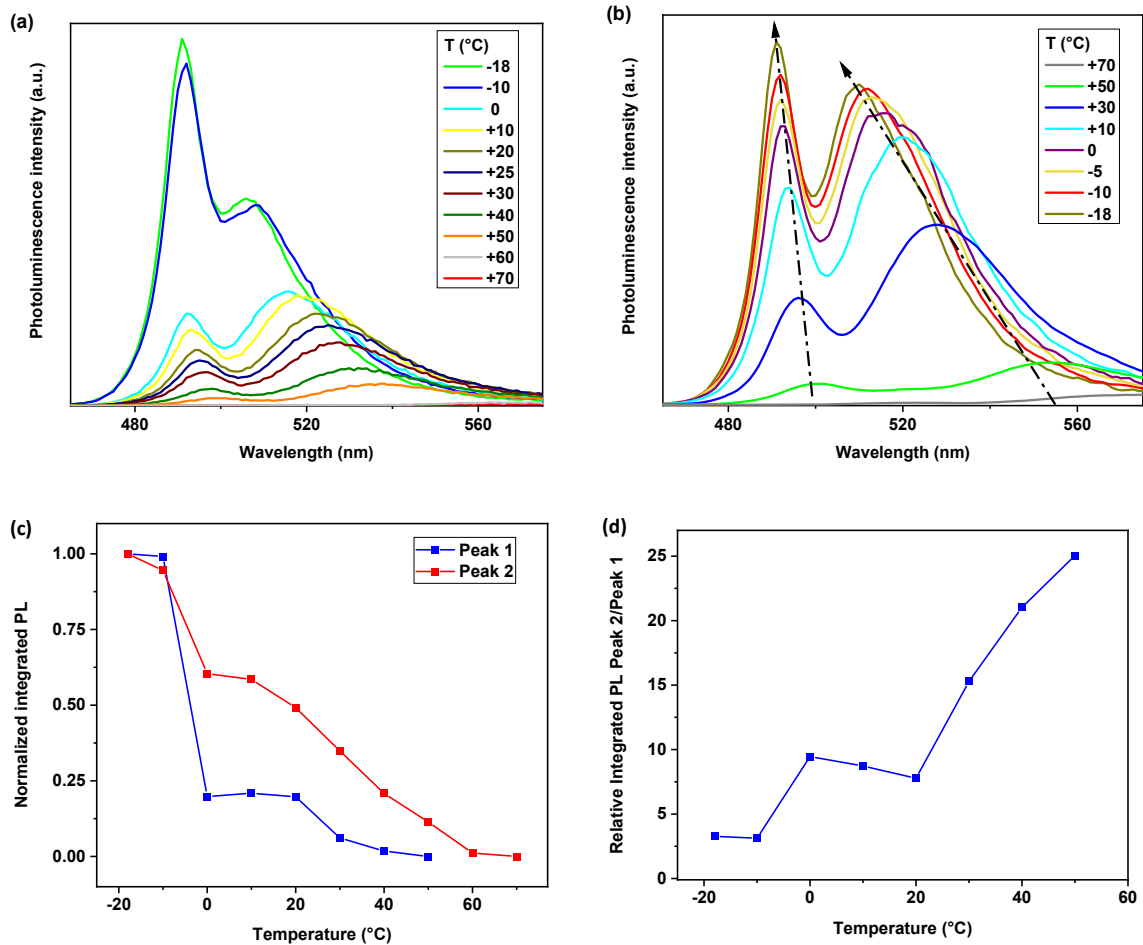

**Figure S6.** Temperature dependent photoluminescence spectra of  $(C_{14}H_{29}NH_3)_2PbI_4$  in the temperature range from (a) -18 to 70 °C, and (b) 70 to -18 °C (reverse). (c) Variation of integrated PL intensity emission peak maxima of  $(C_{14}H_{29}NH_3)_2PbI_4$ . (d) Relative integrated intensities of comparing the ratio of the low energy (Peak 2) to high energy (Peak 1).

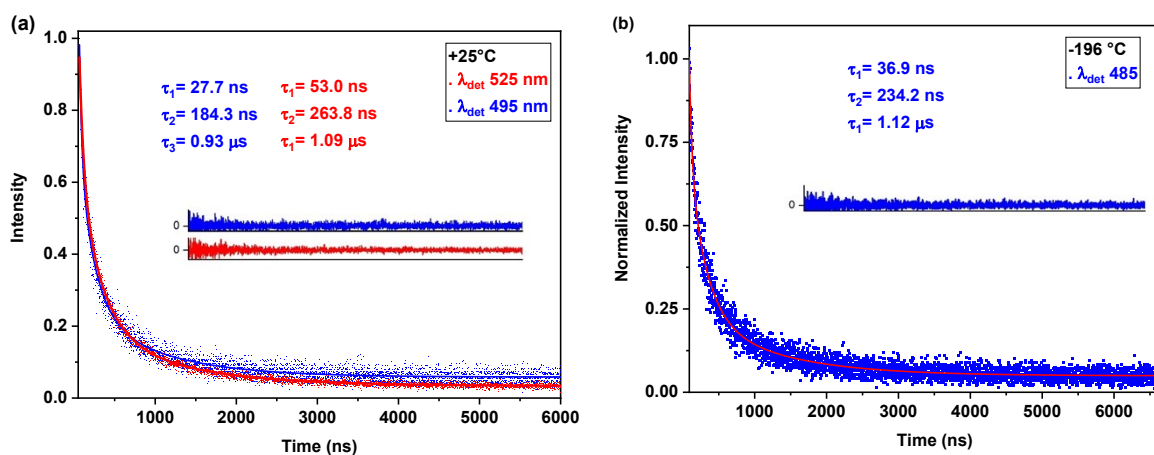

**Figure S7.** (a) Normalized time-resolved photoluminescence decay traces of  $(C_{14}H_{29}NH_3)_2PbI_4$  powders at room temperature with  $\lambda_{ex}$  360 nm. (b) Normalized time-resolved photoluminescence decay trace of  $(C_{14}H_{29}NH_3)_2PbI_4$  powders at -196 °C with  $\lambda_{ex}$  360 nm.

**Table S1.** Quantum yield of 2D compounds at different temperatures (°C) with relative method compared to room temperature.

| Compound                    | Temperature (°C) |      |      |      |      |      |      |      |      |       |       |      |
|-----------------------------|------------------|------|------|------|------|------|------|------|------|-------|-------|------|
|                             | -18              | -10  | 0    | 10   | 20   | 30   | 40   | 50   | 60   | 70    | 80    | 85   |
| $(C_{18}H_{37}NH_3)_2PbI_4$ | 6.30             | 3.06 | 2.83 | 3.07 | 2.93 | 2.57 | 1.85 | 1.21 | 0.74 | 0.42  | 0.10  | 0.06 |
| $(C_{16}H_{33}NH_3)_2PbI_4$ | 0.14             | 0.07 | 0.13 | 0.18 | 0.23 | 0.28 | 0.21 | 0.17 | 0.10 | 0.023 | 0.018 |      |
| $(C_{14}H_{29}NH_3)_2PbI_4$ | 3.54             | 3.52 | 1.85 | 1.85 | 1.61 | 0.73 | 0.72 | 0.44 | 0.09 | 0.07  |       |      |

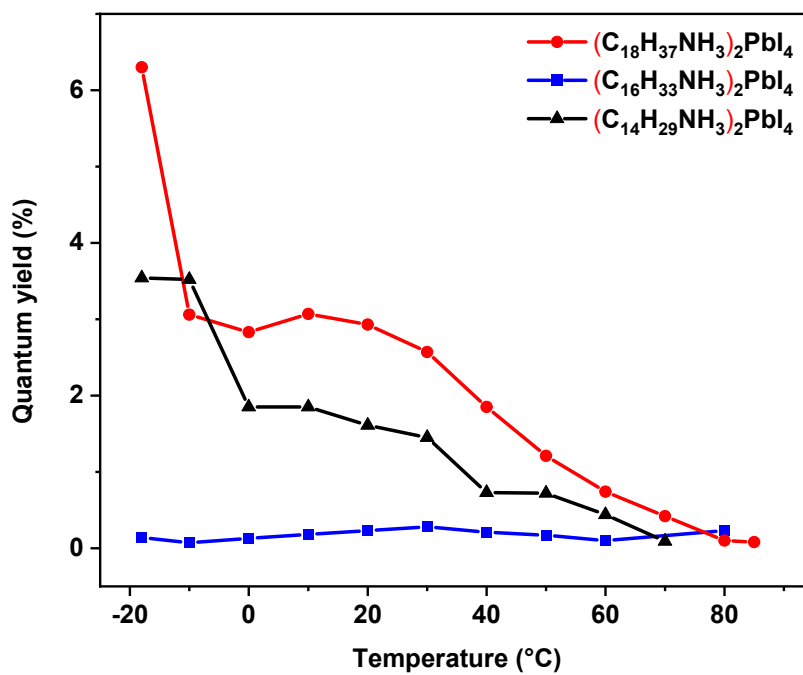

**Figure S8.** Temperature dependence of photoluminescence quantum yields for 2D perovskite compounds: (C<sub>18</sub>H<sub>37</sub>NH<sub>3</sub>)<sub>2</sub>PbI<sub>4</sub>, (C<sub>16</sub>H<sub>33</sub>NH<sub>3</sub>)<sub>2</sub>PbI<sub>4</sub>, and (C<sub>14</sub>H<sub>29</sub>NH<sub>3</sub>)<sub>2</sub>PbI<sub>4</sub>.
